1 **Title**

2 Isolation and genome sequencing of 14 *Spongia* sp. bacterial associates expands the  
3 taxonomic and functional breadth of the cultivatable marine sponge microbiome

4 **Authors**

5 Elham Karimi<sup>a,1\*</sup>, Rodrigo Costa<sup>a,b,c</sup>

6 **Affiliations**

7 <sup>a)</sup> Center of Marine Sciences-CCMAR, Faculty of Science and Technology, Campus of  
8 Gambelas, University of Algarve, 8005-139 Faro, Portugal

9 <sup>b)</sup> Institute for Bioengineering and Biosciences (IBB), Instituto Superior Tecnico,  
10 Universidade de Lisboa, 1049-001 Lisbon, Portugal

11 <sup>c)</sup> Department of Energy, Joint Genome Institute, Walnut Creek, California, USA, and  
12 Lawrence Berkeley National Laboratory, Berkeley, California, USA

13

14 \* **Corresponding author:** Elham Karimi, Sorbonne Universités/CNRS, Station Biologique  
15 de Roscoff, UMR 8227, Integrative Biology of Marine Models, CS 90074, Roscoff, France  
16 Email: [ekarimi@sb-roscoff.fr](mailto:ekarimi@sb-roscoff.fr)

17

18 **Abstract**

19

20 Marine sponges live with complex microbial consortia, which have been considered as  
21 potential sources of novel natural products. However, the usual recalcitrance of host-  
22 associated microorganisms to cultivation makes studying sponge symbionts challenging. To  
23 tackle this complexity, exploration of cultivated sponge-associated bacteria and their coding  
24 potential is unavoidable. In this study, we isolate and report the draft genome sequences of 14  
25 bacterial strains from the marine sponge *Spongia* sp. using R2A and VXA media. The strains  
26 belong to the classes *Actinobacteria*, *Gammaproteobacteria*, *Alphaproteobacteria*, and  
27 *Cytophagia* spanning 11 formally described genera plus two potentially novel genera in the  
28 *Rhodobacteraceae* family and one potentially novel family in the *Cytophagales* order.  
29 Functional genomics revealed presumed symbiosis factors typical of specific taxonomic  
30 groups (i.e. taurine metabolism genes among the *Alphaproteobacteria*, chitinase encoding  
31 genes and eukaryotic-like proteins in the *Cytophagia* genome) while multidrug efflux pumps,

---

<sup>1</sup> **Current affiliation:** Sorbonne Universités/CNRS, Station Biologique de Roscoff, UMR 8227, Integrative Biology of Marine Models, CS 90074, Roscoff, France

32 also important in host-microbe interactions, were common across all genomes. Moreover, we  
33 detected 76 secondary-metabolite biosynthetic gene clusters putatively involved in the  
34 production of drug-like compounds or signalling molecules across all genomes, warranting  
35 future biotechnologically driven research into their coding potential.

## 36 **Keywords**

37 Porifera, genomics, host-microbe interactions, symbiosis, marine microbiology, secondary  
38 metabolite

## 39 1. Introduction

40 Marine sponges possess a complex and distinct microbial consortium considered to be  
41 involved in the provision of nutrients, chemical defence and immunity to their hosts [1].  
42 Although marine sponges have been the source of novel bacterial species [1, 2], yet we lack  
43 clear understanding of the diversity, genome structure and metabolic potential of most sponge  
44 associates. Apart from the ecological importance and roles of sponges and its microbial  
45 community in ecosystem functioning [3], it is now known that the marine sponge microbiome  
46 ranks as one of the most prolific sources of bioactive secondary metabolites in the seas [4, 5].  
47 Isolated bacteria permit the full study of the physiology and function of microorganisms [6].  
48 To date, limited information is available for understanding the physiology and function of  
49 sponge symbionts and their natural product biosynthesis potential. Although recent studies  
50 approaching the coding potential of metagenome-assembled genomes (MAGs) have provided  
51 useful insights into symbiosis factors that govern sponge-prokaryote interactions [7, 8],  
52 examination of cultivated sponge associated bacteria and their genomes is still much required  
53 to address the abovementioned knowledge gaps, especially in regards with the laboratory  
54 validation of the observed genomic traits.  
55 In the present study, we describe the general genomic features and provide brief functional  
56 information of 14 bacterial strains isolated from the marine sponge *Spongia* sp. in the  
57 northeast Atlantic. This study releases new data for the further exploration of complex  
58 sponge-microbe interactions and promotes comparative genomics studies of symbiotic  
59 microorganisms by adding up novel genome resources to public databases, including original  
60 genomes of three novel bacterial lineages unclassifiable at the genus level, the first genome  
61 sequence for the genus *Lentilitoribacter* and further genome assemblies of thus-far poorly-  
62 studied genera such as *Agarivorans*, *Sphingorhabdus* and *Tropicibacter*.

63

## 64 2. Data description

### 65 2.1. Sampling, Isolation, and Genome sequencing

66 In April 2015, *Spongia* sp. specimens (4 biological replicates) were collected by SCUBA  
67 diving at 20 m open water stations in Algarve, Faro (Portugal). In the lab, microbial cell  
68 suspensions (MCSs) were prepared from sponge samples through grinding and  
69 homogenization in artificial seawater as described previously [9]. MCSs were then serially  
70 diluted ( $10^{-3}$  to  $10^{-8}$ ) and 100  $\mu$ L of each dilution were spread plated in triplicates on 1/10R2A  
71 [10] and VXA [11] media. Plates were incubated at 18°C for up to 8 weeks. Bacterial growth  
72 was monitored weekly and colony forming units (CFUs) were counted. Colonies were  
73 selected randomly considering morphologically different ones as well, and pure cultures  
74 obtained by streaking colonies on the same isolation media.

75 In total, 252 colonies (160 from 1/10-R2A and 92 from VXA, Table S1) were  
76 selected. Genomic DNA was extracted from cell pellets derived from freshly grown cultures  
77 using the Wizard® Genomic DNA Purification Kit (Promega, Madison, USA) according to  
78 the manufacturer's instructions. Genomic DNA samples of all isolates were then subjected to  
79 16S rRNA gene amplification by PCR followed by Sanger sequencing according to  
80 established procedures [12]. Taxonomic assignment of bacterial isolates to the genus level  
81 was performed using the classifier tool of the ribosomal database project (RDP, release 11,  
82 [13]. Identification of closest matches to all sequence queries were also obtained using the  
83 BLAST algorithm (February 2018, Table S1).

84 *Alphaproteobacteria* and *Gammaproteobacteria* strains were frequently isolated from  
85 R2A and VXA, respectively (Figure 1). Based on the taxonomic assignments obtained with  
86 RDP (Table S2), 14 strains originating from both media were chosen for genome analysis-  
87 which in most cases would likely correspond to novel genus/species from sponges (Table  
88 S1&S2). These were classified into 11 formally described and 3 potentially novel genera from  
89 *Actinobacteria* (3 genera), *Bacteroidetes* (1 putatively new genus and family), and  
90 *Proteobacteria* (10 genera from Alpha - 6 strains, with two putatively new genera- and from  
91 Gamma - 4 strains - classes) phyla (Table 1).

92 Afterwards, Illumina MiSeq sequencing was carried out at MR DNA (CA, United States).  
93 Paired-end libraries (2×301bp) were accomplished and *de novo* assembly was performed  
94 with the NGen DNA assembly software by DNASTar, Inc. as described previously [14].  
95 Additionally, CheckM v.1.0.18 was used to assess the completeness and contamination of the  
96 generated genomes [15]. Genome annotations were conducted using RAST [16], also using

97 COG database via WebMGA [17]. Furthermore, the genomes were analyzed for the presence  
 98 of gene clusters indicative of secondary metabolism using antiSMASH version 5.0.1 [18].  
 99 Default parameters were used for all software.

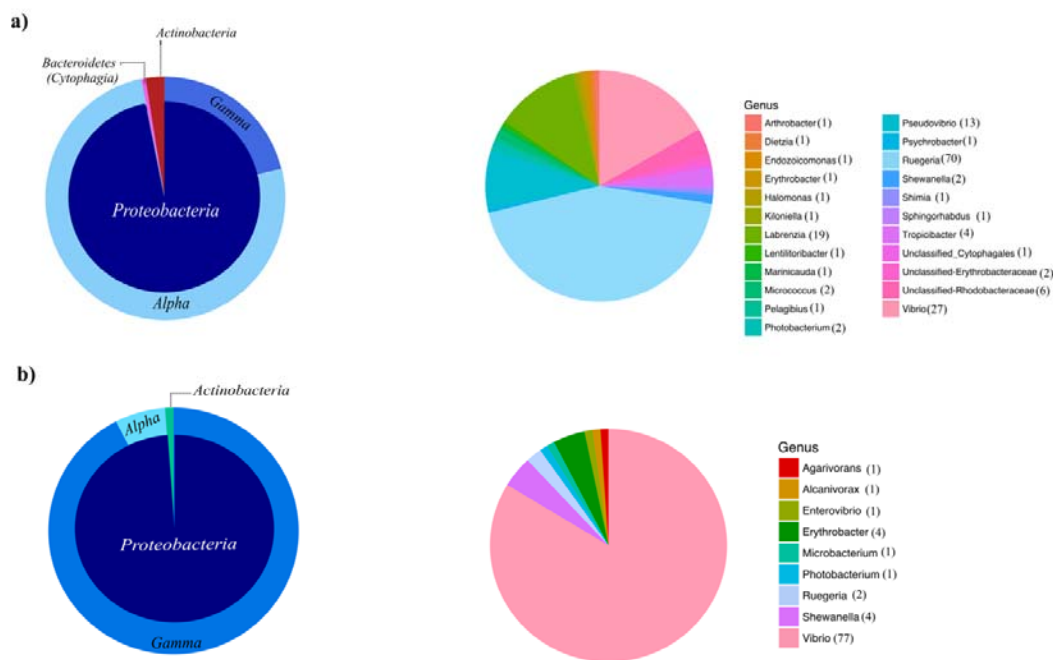

100  
 101 **Figure 1.** Taxonomic distribution of bacteria retrieved from *Spongia* sp. on **a)** 1/10 R2A **b)** VXA media.  
 102 The number in brackets indicate the number of isolates obtained for each genus.

## 104 2.2. Basic Genome Features

105 The genomic feature information of all strains is outlined in Table 1. All genomes possessed  
 106 > 99% completeness (except three genomes) and <1% contamination, suggesting high data  
 107 reliability for further comparative genomic studies, for example.

108 Three genera including *Arthrobacter* sp. Alg241-R88, *Dietzia* sp. Alg238-R159, *Micrococcus*  
 109 sp. Alg238-R198 isolated on 1/10R2A were sequenced from phylum *Actinobacteria*. The size  
 110 of the genomes ranged from 2.59 to 4.37 Mbp with GC content ranging from 64.8 to 72.8 %.  
 111 Gene annotation using RAST identified 4040, 3629, and 2375 protein-coding sequences  
 112 (CDs) for strains Alg241-R88, Alg238-R159, and Alg238-R198, respectively. From COG  
 113 annotations, the genes for glycosyltransferase, acetyltransferases, ABC-type multidrug  
 114 transport system were assigned for these three strains (Table S3).

115 Besides, a novel genome from the phylum *Bacteroides* was sequenced. The genome of  
116 *Cytophagales* bacterium Alg240-R148 is 5.3 Mbp in length with an overall GC content of  
117 38.8%. Gene annotation using RAST identified a total of 4797 coding sequences, 38 tRNAs,  
118 and 6 rRNAs. This genome is 100% complete based on CheckM estimations. The COG  
119 annotation indicated genes involved in ABC-type antimicrobial peptide transport system,  
120 ABC-type multidrug transport system, chitinases, glycosidases and tetratricopeptide repeats  
121 (Table S3).

122 Moreover, six strains of the class *Alphaproteobacteria* belonging to the families  
123 *Phyllobacteriaceae*, *Rhodobacteraceae*, and *Sphingomonadaceae* were sequenced. The size  
124 of the genomes ranged from 2.5 to 4.78 Mbp with GC content ranging from 44.3 to 58.8%.  
125 RAST annotation indicated a range of 2446 coding sequences for *Sphingorhabdus* sp.  
126 Alg239-R122 to 5091 for *Tropicibacter* sp. Alg239-R130. In agreement with recent findings  
127 on sponge-prokaryote symbiosis factors characteristic of *Alphaproteobacteria* species [15],  
128 genes for Glutathione S-transferase, taurine catabolism dioxygenase (except for strain  
129 Alg239-R122), thiamine monophosphate synthase, Catalase (peroxidase I) were predicted for  
130 all presented *Alphaproteobacteria* strains based on COG annotation.

131 From the *Gammaproteobacteria* strains obtained on VXA medium, *Agarivorans* sp. Alg241-  
132 V36, *Alcanivorax* sp. Alg238-V104, *Enterovibrio* sp. Alg239-V16, and *Photobacterium* sp.  
133 Alg240-V54 were sequenced. The first three strains were 100% complete based on CheckM  
134 estimations. Genome sizes across the four genera ranged from 4.38 to 5.7 Mbp with GC  
135 content ranging from 39.8 to 61.3%. RAST annotation indicated a range of 3904 coding  
136 sequences for *Photobacterium* to 5102 for *Enterovibrio*. COG annotations revealed a range of  
137 genes involved in multidrug resistance and transport, and coding for collagenase and related  
138 proteases, putative threonine efflux proteins and Methyl-accepting chemotaxis proteins for all  
139 four strains (Table S3).

140

### 141 2.3. Genome-wide secondary metabolite profiling

142 Totals of 16 (*Actinobacteria*), 3 (*Cytophagia/Bacteroidetes*), 38 (*Alphaproteobacteria*), and  
143 19 (*Gammaproteobacteria*) secondary metabolite biosynthetic gene clusters (BGCs) were  
144 detected using antiSMASH (Figure 2). For *Actinobacteria* strains, PKS (Polyketide  
145 synthases), siderophore, NRPS (Nonribosomal peptide synthetases), betalactone, terpene and  
146 ectoine BGCs were found. For the unclassified *Cytophagales* strain, one bacteriocin, terpene,  
147 and arylpolyene BGC each were detected. For all *Alphaproteobacteria* strains, PKS,  
148 bacteriocin, NRPS, terpene, homoserine lactone (hserlaton), arylpolyene, betalacton, ectoine,

149 and lasso peptide BGCs were predicted. These findings match those observed in earlier studies  
 150 [19], particularly the presence of bacteriocin in *Alphaproteobacteria* species. For all  
 151 *Gammaproteobacteria* strains, shared bacteriocin, betalactone and arylpolyene BGCs were  
 152 found, though for *Enterovibrio* sp. Alg239-V16 eight different BGCs were predicted (Figure  
 153 2). These results highlight the genomic potential of the isolated bacteria for natural product  
 154 discovery.

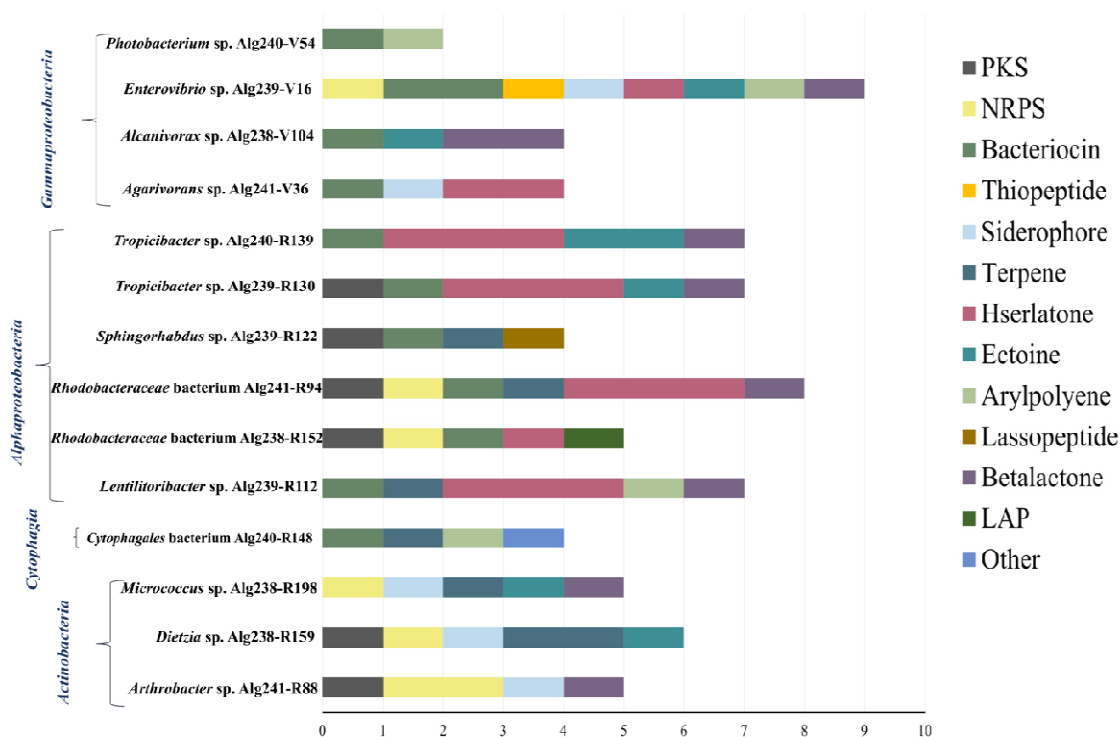

155 **Figure 2.** Secondary metabolite biosynthetic gene clusters predicted with antiSMASH across all the studied  
 156 genomes.  
 157

### 158 Genome sequence accession number

159 The assembled genome sequences are available in the European Nucleotide Archive -  
 160 European Molecular Biology Laboratory- EBI under the project number PRJEB28331 and  
 161 can be accessed using the accession numbers given in Table 1.  
 162 (<http://www.ebi.ac.uk/ena/data/view/> <ACCESSION NUMBER>). Also, 16S rRNA gene  
 163 sequences of the bacterial isolates (OTUs) were deposited at NCBI GenBank under the  
 164 accession numbers MH818465 to MH818518 (Table S2).

Table 1. Genome features of all bacterial strains described in this study.

| Genomes                                       | Class                | Order             | Family             | Genome size (Mbp) | Completeness (%) | Contamination (%) | coverage (X) | GC content (mol%) | Coding sequences (CDs) | rRNAs (n.b) | tRNAs (n.b) | Culture Medium | Accession Numbers             |
|-----------------------------------------------|----------------------|-------------------|--------------------|-------------------|------------------|-------------------|--------------|-------------------|------------------------|-------------|-------------|----------------|-------------------------------|
| <b>Actinobacteria</b>                         |                      |                   |                    |                   |                  |                   |              |                   |                        |             |             |                |                               |
| <i>Arthrobacter</i> sp. Alg241-R88            | Actinobacteria       | Micrococcales     | Micrococcaceae     | 4.37              | 99.71            | 0.73              | 162          | 64.8              | 4040                   | 8           | 55          | R2A            | UNRG01000001-<br>UNRG01000019 |
| <i>Dietzia</i> sp. Alg238-R159                | Actinobacteria       | Corynebacteriales | Dietziaceae        | 3.9               | 99.41            | 0                 | 207          | 70.1              | 3629                   | 10          | 50          | R2A            | UNRI01000001-<br>UNRI01000030 |
| <i>Micrococcus</i> sp. Alg238-R198            | Actinobacteria       | Micrococcales     | Micrococcaceae     | 2.59              | 98.7             | 0.23              | 306          | 72.8              | 2375                   | 7           | 48          | R2A            | UNRH01000001-<br>UNRH01000027 |
| <b>Bacteroidetes</b>                          |                      |                   |                    |                   |                  |                   |              |                   |                        |             |             |                |                               |
| <i>Cytophagales</i> bacterium Alg240-R148     | Cytophagia           | Cytophagales      | Unknown            | 5.3               | 100              | 1.79              | 162          | 38.8              | 4797                   | 6           | 38          | R2A            | LS999826-LS999826             |
| <b>Proteobacteria</b>                         |                      |                   |                    |                   |                  |                   |              |                   |                        |             |             |                |                               |
| <i>Lentilitoribacter</i> sp. Alg239-R112      | Alpha-proteobacteria | Rhizobiales       | Phyllobacteriaceae | 3.91              | 99.92            | 0                 | 198          | 44.3              | 3937                   | 4           | 36          | R2A            | LS999833-LS999833             |
| <i>Rhodobacteraceae</i> bacterium Alg238-R152 | Alpha-proteobacteria | Rhodobacterales   | Rhodobacteraceae   | 4.26              | 99.15            | 0.38              | 197          | 56.4              | 4264                   | 5           | 43          | R2A            | UNRJ01000001-<br>UNRJ01000014 |
| <i>Rhodobacteraceae</i> bacterium Alg241-R94  | Alpha-proteobacteria | Rhodobacterales   | Rhodobacteraceae   | 4.87              | 99.25            | 0.43              | 156          | 54.8              | 4799                   | 9           | 45          | R2A            | UNRF01000001-<br>UNRF01000027 |
| <i>Sphingorhabdus</i> sp. Alg239-R122         | Alpha-proteobacteria | Sphingomonadales  | Sphingomonadaceae  | 2.5               | 98.77            | 0.73              | 362          | 54                | 2446                   | 3           | 39          | R2A            | UNRC01000001-<br>UNRC01000002 |
| <i>Tropicibacter</i> sp. Alg239-R130          | Alpha-proteobacteria | Rhodobacterales   | Rhodobacteraceae   | 5.2               | 99.15            | 0                 | 108          | 58.8              | 5091                   | 5           | 45          | R2A            | UNRB01000001-<br>UNRB01000021 |
| <i>Tropicibacter</i> sp. Alg240-R139          | Alpha-proteobacteria | Rhodobacterales   | Rhodobacteraceae   | 4.65              | 99.47            | 0.48              | 171          | 57.8              | 4642                   | 6           | 48          | R2A            | UNRA01000001-<br>UNRA01000014 |
| <i>Agarivorans</i> sp. Alg241-V36             | Gamma-proteobacteria | Alteromonadales   | Alteromonadaceae   | 4.7               | 100              | 0.89              | 130          | 44.7              | 4346                   | 21          | 86          | VXA            | UNRE01000001-<br>UNRE01000014 |
| <i>Alcanivorax</i> sp. Alg238-V104            | Gamma-proteobacteria | Oceanospirillales | Alcanivoracaceae   | 5.14              | 100              | 0                 | 287          | 61.3              | 4776                   | 4           | 43          | VXA            | UNRD01000001-<br>UNRD01000031 |
| <i>Enterovibrio</i> sp. Alg239-V16            | Gamma-proteobacteria | Vibrionales       | Vibrionaceae       | 5.7               | 100              | 0                 | 120          | 47.7              | 5102                   | 19          | 101         | VXA            | UNRK01000001-<br>UNRK01000034 |
| <i>Photobacterium</i> sp. Alg240-V54          | Gamma-proteobacteria | Vibrionales       | Vibrionaceae       | 4.38              | 97.87            | 0.39              | 110          | 39.8              | 3904                   | 27          | 144         | VXA            | UNRL01000001-<br>UNRL01000022 |

**NOTES: 1-** According to the MixS standards, metadata associated with all presented genomes have been defined as follows. Habitat: Sea water, Host: Marine Sponge, Investigation type: Bacteria, Project name: isolated sponge-associated bacteria, Environment (biome): Ocean, Environment (feature): Coastal water body, Environments (material): Sea water, Country: Portugal, Latitude and longitude: 36.9798°N -7.9889°W, Depth: 20 m, Collection date: 30/04/2015, Assembly method: *de novo* with NGen software.  
**2-** Estimated genomes completeness and contamination have been analysed using CheckM v.1.0.18.



## Acknowledgments

The authors would like to thank Jorge M.S. Gonçalves' research team at CCMAR-UAlg for sampling the sponges from the sea. We thank Telma Franco for her help during sample processing and Marta Valente for Sanger-sequencing of 16S rRNA genes. EK would like sincerely to thank Alireza Asvadi for his encouragement to write up the study. This work was performed when EK was PhD student supported by a full scholarship from the Erasmus Mundus Programme/SALAM EMA2 lot7/SALA1206422. Material and resources for the lab experiments were funded by FCT- Fundação para a Ciência e a Tecnologia (Portugal) through the project grant PTDC/BIA-MIC/3865/2012, conceded to RC. The funders had no role in study design, data collection and interpretation, or the decision to submit the work for publication.

## Author contributions

**Elham Karimi:** conceived the study, performed experiments, curated and analysed the data, wrote the original manuscript draft. **Rodrigo Costa:** conceived the study, provided materials, reviewed and edited the original manuscript draft. Both authors reviewed and edited the final manuscript draft.

## Declaration of Competing Interest

The authors declare no conflicts of interest.

## Ethics statement

This study relied on *in situ* sampling of microorganisms from marine invertebrates without a nervous system, and as such was exempt from ethical approval procedures according to the current Portuguese legislation (Decreto-Lei n° 113/2013). This study did not occur within privately owned or protected areas. This study did not involve endangered or protected species. The sampling methodology privileged minimally invasive handling procedures, following the guidelines of the European Directive 2010/63/EU.

## Supplementary Material

**Table S1.** 16S rRNA gene-based classification (genus level) and closest 16S rRNA gene relatives of bacterial isolates obtained from *Spongia* sp. on 1/10R2A and VXA media.

**Table S2.** Hierarchical, 16S rRNA gene-based taxonomic affiliation of bacterial isolates retrieved from *Spongia* sp. on **a)** 1/10R2A and **b)** VXA media, with their respective grouping



into OTUs at 98% 16S rRNA gene identity.

**Table S3.** COG annotation of sponge-associated bacterial genomes presented in this study.

## References:

- [1] T. Thomas, L. Moitinho-Silva, M. Lurgi, J.R. Björk, C. Easson, C. Astudillo-García, J.B. Olson, P.M. Erwin, S. López-Legentil, H. Luter, A. Chaves-Fonnegra, R. Costa, P.J. Schupp, L. Steindler, D. Erpenbeck, J. Gilbert, R. Knight, G. Ackermann, J. Victor Lopez, M.W. Taylor, J.M. Montoya, U. Hentschel, N.S. Webster, Diversity, structure and convergent evolution of the global sponge microbiome, *Nat Commun*, 7 (2016) 11870, doi: 10.1038/ncomms11870.
- [2] C.P. Rua, A.E. Trindade-Silva, L.R. Appolinario, T.M. Venas, G.D. Garcia, L.S. Carvalho, A. Lima, R. Kruger, R.C. Pereira, R.G. Berlinck, R.A. Valle, C.C. Thompson, F. Thompson, Diversity and antimicrobial potential of culturable heterotrophic bacteria associated with the endemic marine sponge *Arenosclera brasiliensis*, *PeerJ*, 2 (2014) e419, doi: 10.7717/peerj.419.
- [3] L. Pita, L. Rix, B.M. Slaby, A. Franke, U. Hentschel, The sponge holobiont in a changing ocean: from microbes to ecosystems, *Microbiome*, 6 (2018) 46, doi: 10.1186/s40168-018-0428-1.
- [4] U. Hentschel, J. Piel, S.M. Degnan, M.W. Taylor, Genomic insights into the marine sponge microbiome, *Nat. Rev. Microbiol.*, 10 (2012) 641-654, doi: 10.1038/nrmicro2839.
- [5] M.C. Wilson, T. Mori, C. Ruckert, A.R. Uria, M.J. Helf, K. Takada, C. Gernert, U.A. Steffens, N. Heycke, S. Schmitt, C. Rinke, E.J. Helfrich, A.O. Brachmann, C. Gurgui, T. Wakimoto, M. Kracht, M. Crusemann, U. Hentschel, I. Abe, S. Matsunaga, J. Kalinowski, H. Takeyama, J. Piel, An environmental bacterial taxon with a large and distinct metabolic repertoire, *Nature*, 506 (2014) 58-62, doi: 10.1038/nature12959.
- [6] J. Gutleben, M. Chaib De Mares, J.D. van Elsas, H. Smidt, J. Overmann, D. Sipkema, The multi-omics promise in context: from sequence to microbial isolate, *Crit Rev Microbiol*, 44 (2018) 212-229, doi: 10.1080/1040841X.2017.1332003.
- [7] I. Burgsdorf, B.M. Slaby, K.M. Handley, M. Haber, J. Blom, C.W. Marshall, J.A. Gilbert, U. Hentschel, L. Steindler, Lifestyle evolution in cyanobacterial symbionts of sponges, *Mbio*, 6 (2015) e00391-00315, doi: 10.1128/mBio.00391-15.
- [8] E. Karimi, B.M. Slaby, A.R. Soares, J. Blom, U. Hentschel, R. Costa, Metagenomic binning reveals versatile nutrient cycling and distinct adaptive features in alphaproteobacterial symbionts of marine sponges, *FEMS Microbiol Ecol*, 94 (2018) fyy074-fyy074, doi: 10.1093/femsec/fyy074.
- [9] E. Karimi, Metagenomics and functional genomics of bacterial symbionts of Spongia (Porifera, Dictyoceratida) specimens from the Algarvian shore (South Portugal), Algarve University, <http://hdl.handle.net/10400.1/10819>, 2018.
- [10] D.J. Reasoner, E.E. Geldreich, A new medium for the enumeration and subculture of bacteria from potable water, *Appl Environ Microbiol*, 49 (1985) 1-7.
- [11] M. Sait, P. Hugenholtz, P.H. Janssen, Cultivation of globally distributed soil bacteria from phylogenetic lineages previously only detected in cultivation-independent surveys, *Environ Microbiol*, 4 (2002) 654-666, doi: 10.1046/j.1462-2920.2002.00352.x.
- [12] A.I.S. Esteves, C.C.P. Hardoim, J.R. Xavier, J.M. Goncalves, R. Costa, Molecular richness and biotechnological potential of bacteria cultured from Irciniidae sponges in the north-east Atlantic, *FEMS Microbiol Ecol*, 85 (2013) 519-536, doi: 10.1111/1574-6941.12140.

- [13] J.R. Cole, Q. Wang, E. Cardenas, J. Fish, B. Chai, R.J. Farris, A. Kulam-Syed-Mohideen, D.M. McGarrell, T. Marsh, G.M. Garrity, The Ribosomal Database Project: improved alignments and new tools for rRNA analysis, *Nucleic Acids Res.*, 37 (2009) D141-D145, doi: 10.1093/nar/gkn879.
- [14] E. Karimi, J.M.S. Gonçalves, M. Reis, R. Costa, Draft Genome Sequence of *Microbacterium* sp. Strain Alg239\_V18, an Actinobacterium Retrieved from the Marine Sponge *Spongia* sp, *Genome Announc.*, 5 (2017), doi: 10.1128/genomeA.01457-16.
- [15] D.H. Parks, M. Imelfort, C.T. Skennerton, P. Hugenholtz, G.W. Tyson, CheckM: assessing the quality of microbial genomes recovered from isolates, single cells, and metagenomes, *Genome Res.*, 25 (2015) 1043–1055, doi: 10.1101/gr.186072.114.
- [16] R.K. Aziz, D. Bartels, A.A. Best, M. DeJongh, T. Disz, R.A. Edwards, K. Formsma, S. Gerdes, E.M. Glass, M. Kubal, The RAST server: rapid annotations using subsystems technology, *BMC Genomics*, 9 (2008) 1, doi: 10.1186/1471-2164-9-75.
- [17] S. Wu, Z. Zhu, L. Fu, B. Niu, W. Li, WebMGA: a customizable web server for fast metagenomic sequence analysis, *BMC Genomics*, 12 (2011) 444, doi: 10.1186/1471-2164-12-444.
- [18] K. Blin, S. Shaw, K. Steinke, R. Villebro, N. Ziemert, S.Y. Lee, M.H. Medema, T. Weber, antiSMASH 5.0: updates to the secondary metabolite genome mining pipeline, *Nucleic Acids Res.*, 47 (2019) W81-W87, doi: 10.1093/nar/gkz310.
- [19] E. Karimi, T. Keller-Costa, B.M. Slaby, C.J. Cox, U.N. da Rocha, U. Hentschel, R. Costa, Genomic blueprints of sponge-prokaryote symbiosis are shared by low abundant and cultivatable Alphaproteobacteria, *Sci. Rep.*, 9 (2019) 1999, doi: 10.1038/s41598-019-38737-x.
